# Supplementary material for: Asymmetric trapping of zwitterionic intermediates by sulphur ylides in a palladium-catalysed decarboxylation-cycloaddition sequence
Source: Springer Nature journal article supplement (doi:10.1038/ncomms6500), 2014-11-21
Supplement: 41467_2014_BFncomms6500_MOESM55_ESM.mol [file 41467_2014_BFncomms6500_MOESM55_ESM.mol]

  ChemDraw11061411572D

 32 35  0  0  0  0  0  0  0  0999 V2000
   -0.5794    0.5561    0.0000 N   0  0  0  0  0  0  0  0  0  0  0  0
   -0.0945    1.2236    0.0000 C   0  0  0  0  0  0  0  0  0  0  0  0
   -0.5794    1.8910    0.0000 C   0  0  0  0  0  0  0  0  0  0  0  0
   -1.3641    1.6361    0.0000 C   0  0  0  0  0  0  0  0  0  0  0  0
   -2.0785    2.0486    0.0000 C   0  0  0  0  0  0  0  0  0  0  0  0
   -2.7930    1.6361    0.0000 C   0  0  0  0  0  0  0  0  0  0  0  0
   -2.7930    0.8111    0.0000 C   0  0  0  0  0  0  0  0  0  0  0  0
   -2.0785    0.3986    0.0000 C   0  0  0  0  0  0  0  0  0  0  0  0
   -1.3641    0.8111    0.0000 C   0  0  0  0  0  0  0  0  0  0  0  0
   -0.3245    2.6756    0.0000 C   0  0  0  0  0  0  0  0  0  0  0  0
   -0.8765    3.2887    0.0000 C   0  0  0  0  0  0  0  0  0  0  0  0
   -0.3245   -0.2285    0.0000 S   0  0  0  0  0  0  0  0  0  0  0  0
   -1.1091   -0.4834    0.0000 O   0  0  0  0  0  0  0  0  0  0  0  0
    0.4601    0.0264    0.0000 O   0  0  0  0  0  0  0  0  0  0  0  0
   -0.0696   -1.0131    0.0000 C   0  0  0  0  0  0  0  0  0  0  0  0
    0.7374   -1.1846    0.0000 C   0  0  0  0  0  0  0  0  0  0  0  0
    0.9924   -1.9693    0.0000 C   0  0  0  0  0  0  0  0  0  0  0  0
    0.4403   -2.5824    0.0000 C   0  0  0  0  0  0  0  0  0  0  0  0
    0.6953   -3.3670    0.0000 C   0  0  0  0  0  0  0  0  0  0  0  0
   -0.3666   -2.4108    0.0000 C   0  0  0  0  0  0  0  0  0  0  0  0
   -0.6216   -1.6262    0.0000 C   0  0  0  0  0  0  0  0  0  0  0  0
    0.7305    1.2236    0.0000 C   0  0  0  0  0  0  0  0  0  0  0  0
    1.1430    0.5091    0.0000 O   0  0  0  0  0  0  0  0  0  0  0  0
    1.9680    0.5091    0.0000 C   0  0  0  0  0  0  0  0  0  0  0  0
    2.3805   -0.2054    0.0000 C   0  0  0  0  0  0  0  0  0  0  0  0
    2.7930   -0.9198    0.0000 C   0  0  0  0  0  0  0  0  0  0  0  0
    1.1430    1.9380    0.0000 C   0  0  0  0  0  0  0  0  0  0  0  0
    0.7305    2.6525    0.0000 C   0  0  0  0  0  0  0  0  0  0  0  0
    1.1430    3.3670    0.0000 C   0  0  0  0  0  0  0  0  0  0  0  0
    1.9680    3.3670    0.0000 C   0  0  0  0  0  0  0  0  0  0  0  0
    2.3805    2.6525    0.0000 C   0  0  0  0  0  0  0  0  0  0  0  0
    1.9680    1.9380    0.0000 C   0  0  0  0  0  0  0  0  0  0  0  0
  2  1  1  6      
  2  3  1  0      
  3  4  1  0      
  4  5  1  0      
  5  6  2  0      
  6  7  1  0      
  7  8  2  0      
  8  9  1  0      
  1  9  1  0      
  4  9  2  0      
 10 11  2  0      
  3 10  1  1      
 12 13  2  0      
 12 14  2  0      
 12 15  1  0      
 15 16  1  0      
 16 17  2  0      
 17 18  1  0      
 18 19  1  0      
 18 20  2  0      
 20 21  1  0      
 15 21  2  0      
  1 12  1  0      
 24 25  1  0      
 25 26  3  0      
 23 24  1  0      
 22 23  1  1      
 27 28  1  0      
 28 29  2  0      
 29 30  1  0      
 30 31  2  0      
 31 32  1  0      
 27 32  2  0      
 22 27  1  0      
  2 22  1  0      
M  END
